# Supplementary material for: Biochemical markers of ongoing joint damage in rheumatoid arthritis - current and future applications, limitations and opportunities
Source: Springer Nature journal article supplement (doi:10.1186/ar3280), 2011-01-01

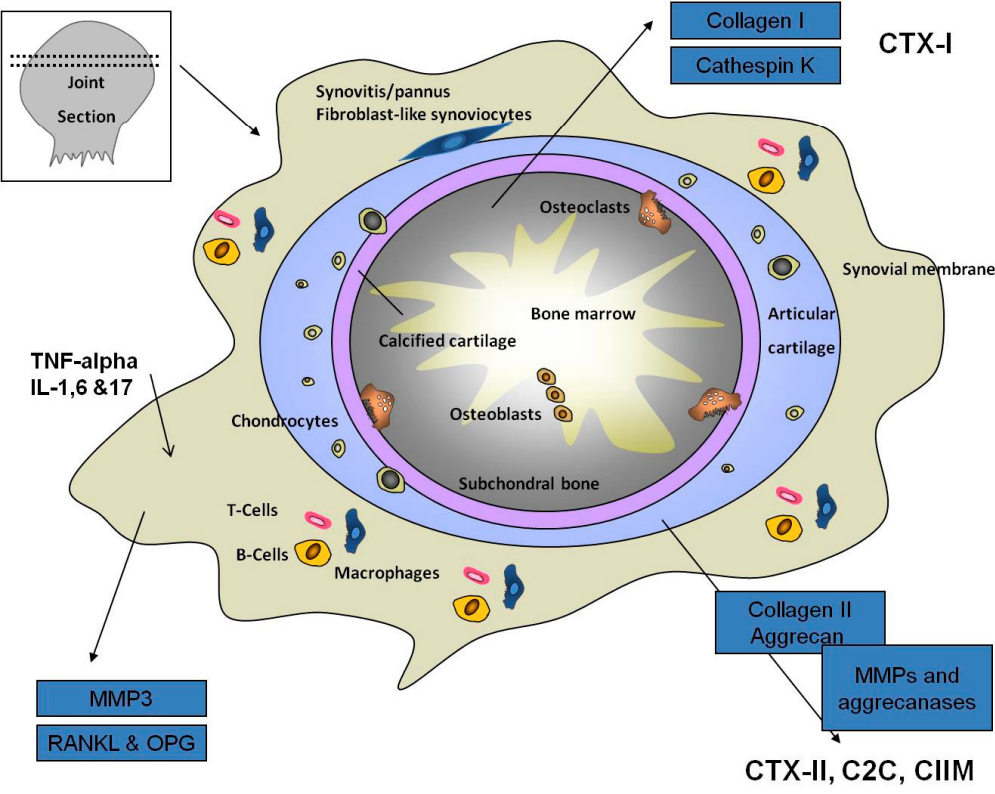

Supplement: 13075_2011_3051_MOESM1_ESM.pdf [file 13075_2011_3051_MOESM1_ESM.pdf]
