# Supplementary material for: Biochemical markers of ongoing joint damage in rheumatoid arthritis - current and future applications, limitations and opportunities
Source: Springer Nature journal article supplement (doi:10.1186/ar3280), 2011-01-01

A

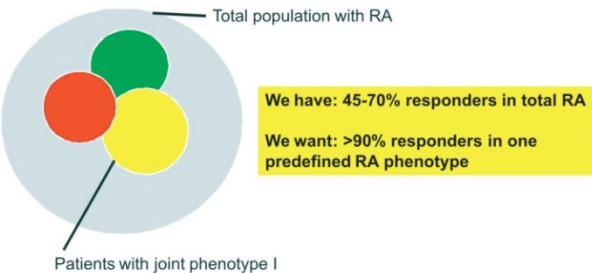

B

Biomarker selection of patients who will respond to a given treatment

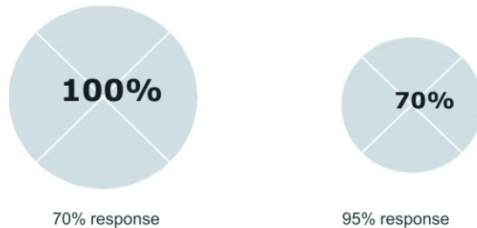

C

Prognostic Biomarker in Untreated Patients

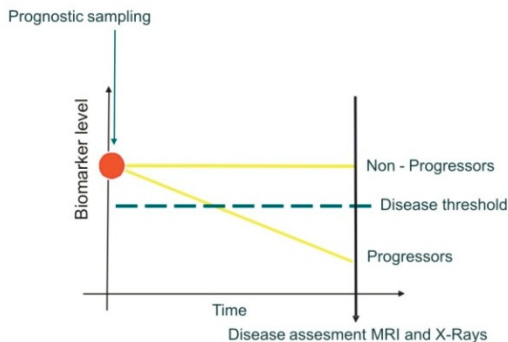

D

Efficacy Biomarker – Intervention Study

Efficacy Sampling

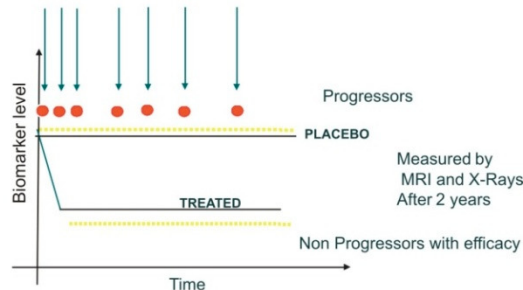

Supplement: 13075_2011_3051_MOESM6_ESM.pdf [file 13075_2011_3051_MOESM6_ESM.pdf]
